# Supplementary material
Source: Springer Nature journal article supplement (https://www.springermedizin.de/resource/supplementary/12913_2013_2970_MOESM4_ESM.pdf/9532474)

# Drivers

- Government policies
- Cost saving
- Complaints

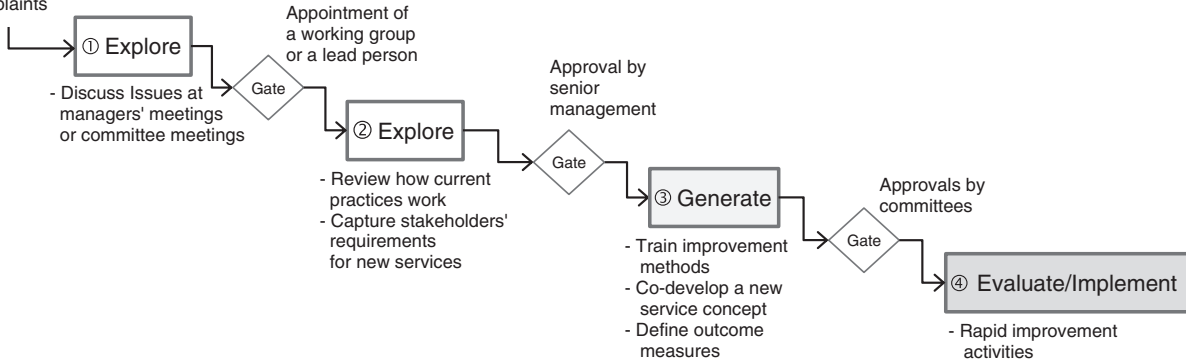

Supplement: MOESM4 [file 9532474]
